# Supplementary material for: Nuclear numbers in syncytial muscle fibers promote size but limit the development of larger myonuclear domains
Source: Nat Commun. 2020 Dec 8;11:6287. doi: 10.1038/s41467-020-20058-7 (PMC7722938; doi:10.1038/s41467-020-20058-7)
Supplement: Supplementary file 1 — Supplementary Information [file 41467_2020_20058_MOESM1_ESM.pdf]

## **Supplementary Information**

### **Nuclear numbers in syncytial muscle fibers promote size but limit flexibility**

**Cramer AW. et al.**

This PDF file includes:

- Supplementary Figure 1
- Supplementary Figure 2
- Supplementary Figure 3
- Supplementary Figure 4
- Supplementary Figure 5
- Supplementary Figure 6
- Supplementary Figure 7

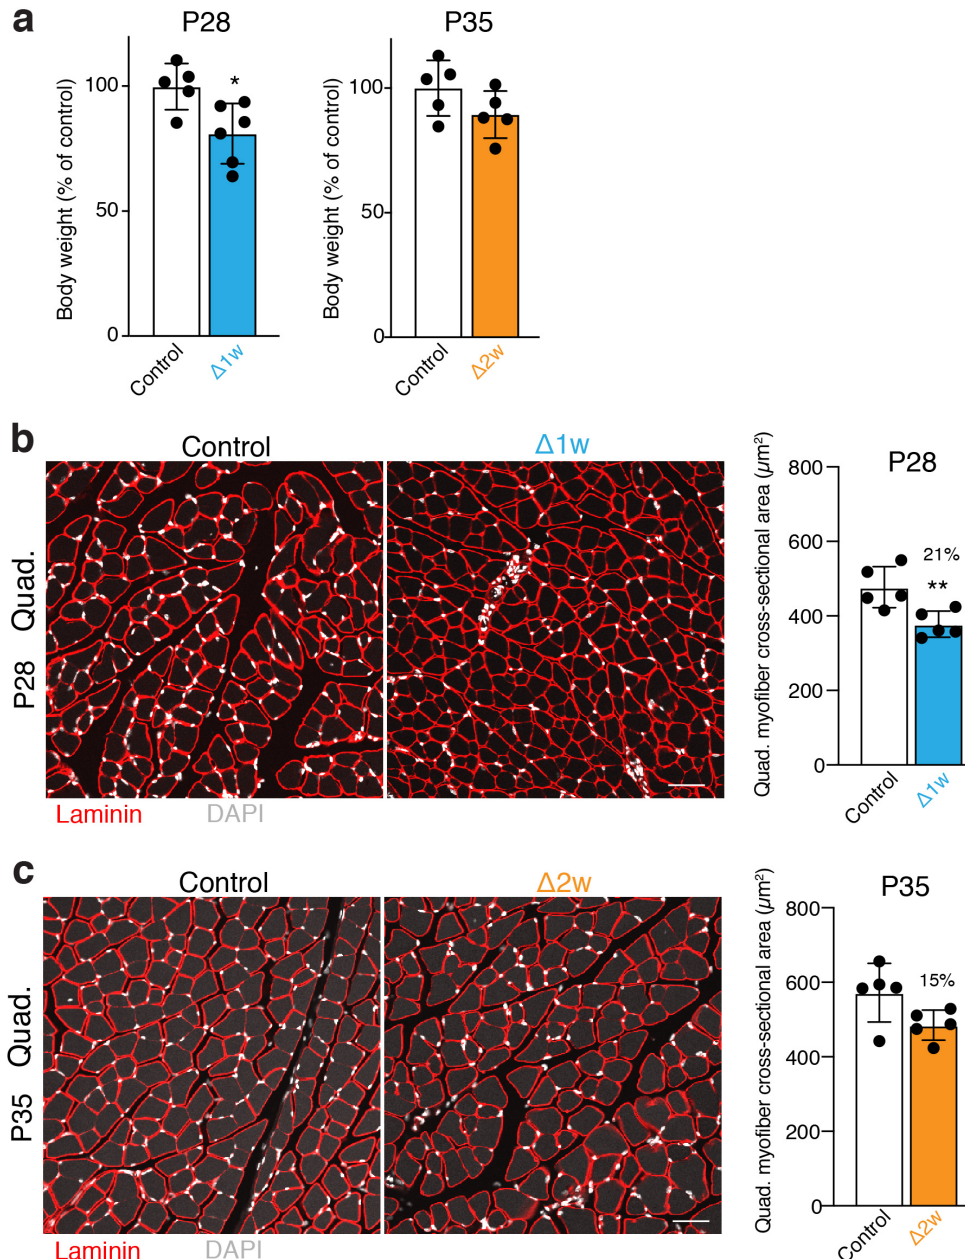

**Supplementary Fig. 1** Effects of reduced myonuclear number on cross-sectional area of quadriceps. **a** Body weights of  $\Delta 1w$  (left) and  $\Delta 2w$  (right) mice expressed as a percent of their respective control mice 4 weeks after tamoxifen administration ( $n = 5-6$  biologically independent animals). **b** Sections of quadriceps (Quad.) muscle of  $\Delta 1w$  and control mice at P28 (left). Analysis of cross-sectional area (right) revealed a 21% reduction in  $\Delta 1w$  myofiber cross-sectional area compared to controls. **c** Sections of quadriceps muscle of  $\Delta 2w$  and control mice at P35 (left). Cross-sectional area analysis (right) showed  $\Delta 2w$  myofibers are 15% smaller than controls in the quad. Sections in **b** and **c** were immunostained with laminin antibodies (red) and stained with DAPI (white). At least 3 20x images were analyzed per mouse in **b** and **c** ( $n = 5$  biologically independent animals). Statistical analyses and data presentation: **a-c**, two-sided unpaired  $t$ -test; \* $p < 0.05$ ,

**\*\*p<0.01.** Data are represented as mean  $\pm$  SD. Scale bar: 50  $\mu$ m. Source data are provided as a Source Data file.

**a**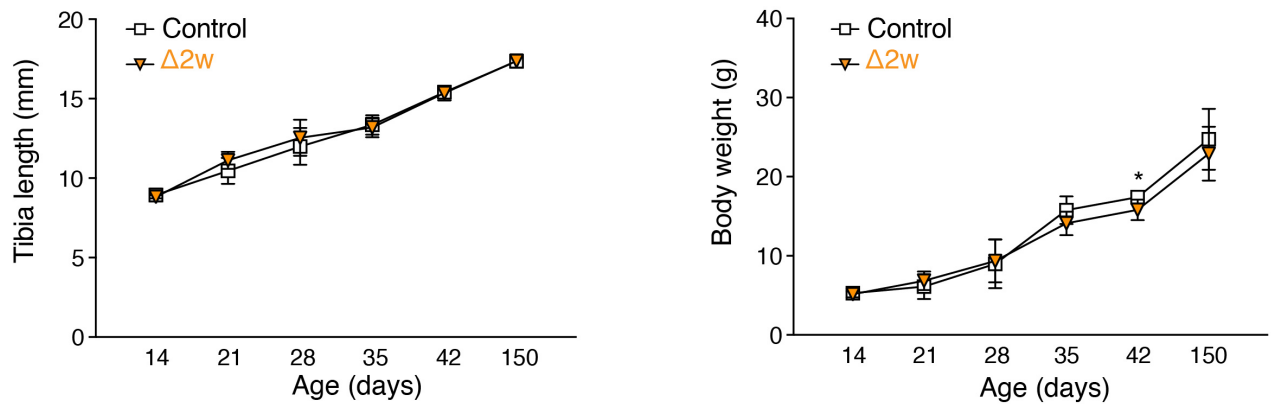**b**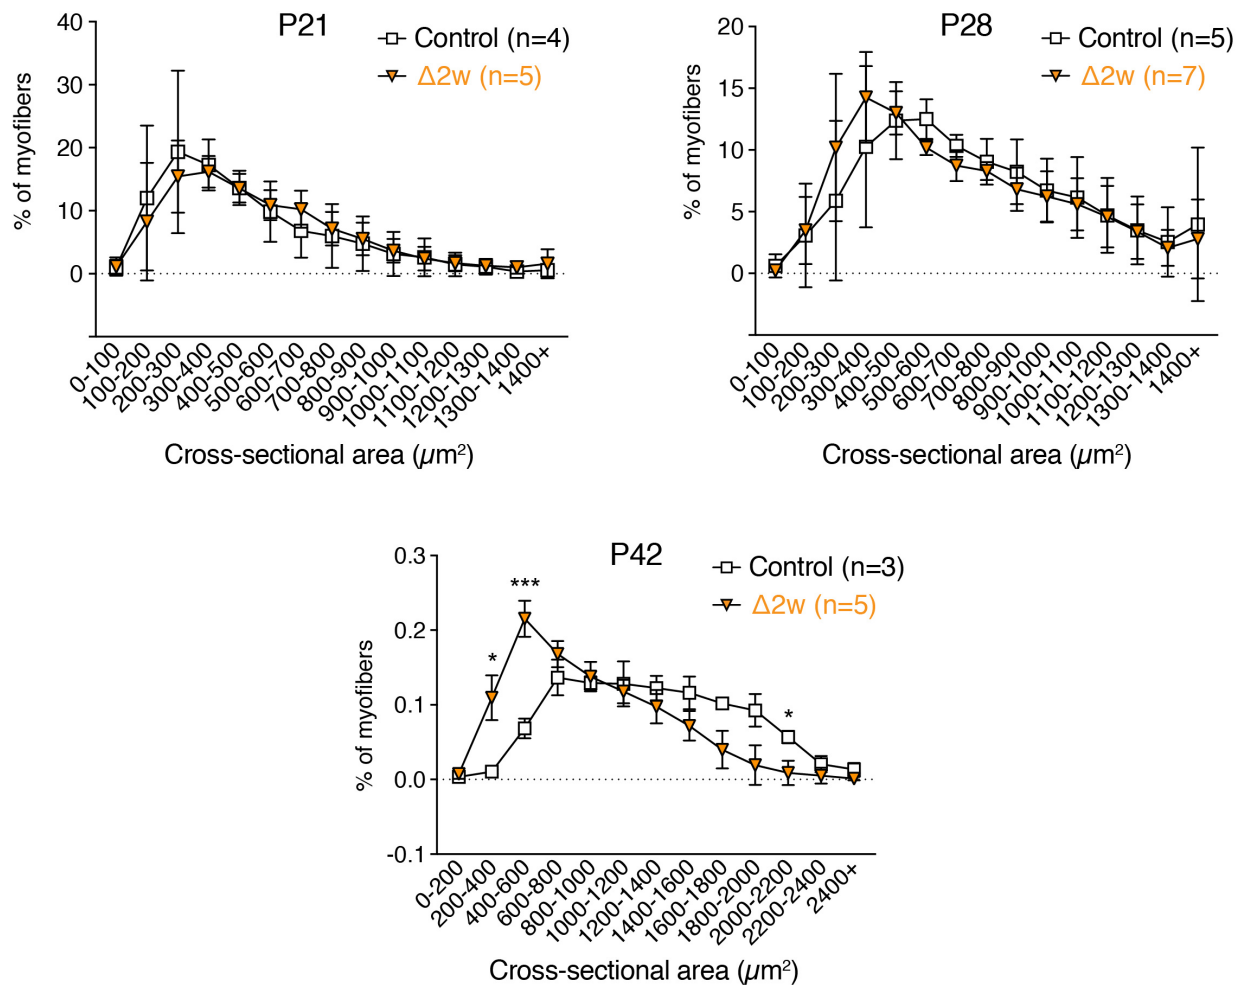

**Supplementary Fig. 2** Kinetics of muscle growth in  $\Delta 2w$  mice. **a** Tibia length (left) and body weight (right) measurements at various timepoints revealed  $\Delta 2w$  mice grow at the same rate as controls from P14 to P150 (P14 control n=3,  $\Delta 2w$  n=4; P21 control n=6,  $\Delta 2w$

n=10; P28 control n=6,  $\Delta$ 2w n=8; P35 control n=5,  $\Delta$ 2w n=5; P42 control n=7,  $\Delta$ 2w n=9; P150 control n=5,  $\Delta$ 2w n=15). **b** Tibialis anterior myofiber cross-sectional area size distribution at P21, P28, and P42. At least 3 20x images were analyzed per mouse. Statistical analyses and data presentation: **a** and **b** multiple two-sided unpaired *t*-tests (**a**: one per timepoint, **b**: one per CSA bin); \**p*<0.05, \*\*\**p*<0.001. Data are represented as mean  $\pm$  SD. Source data are provided as a Source Data file.

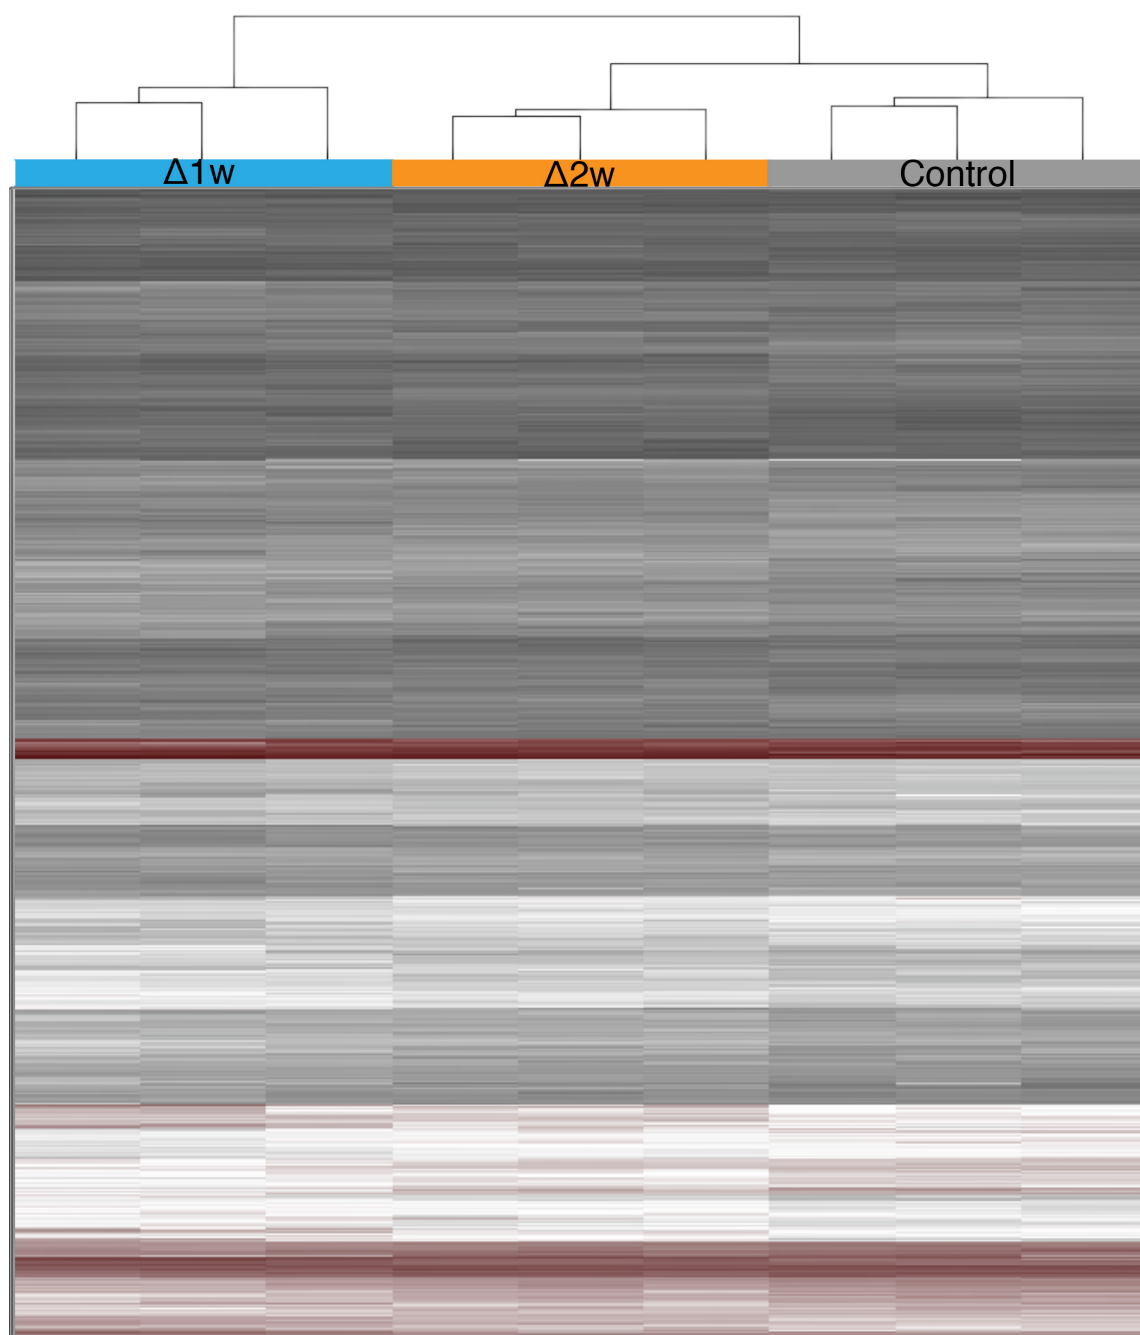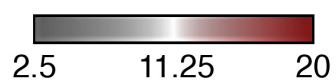

**Supplementary Fig. 3** Hierarchical cluster analysis of control,  $\Delta 1w$ , and  $\Delta 2w$  muscle at P28.

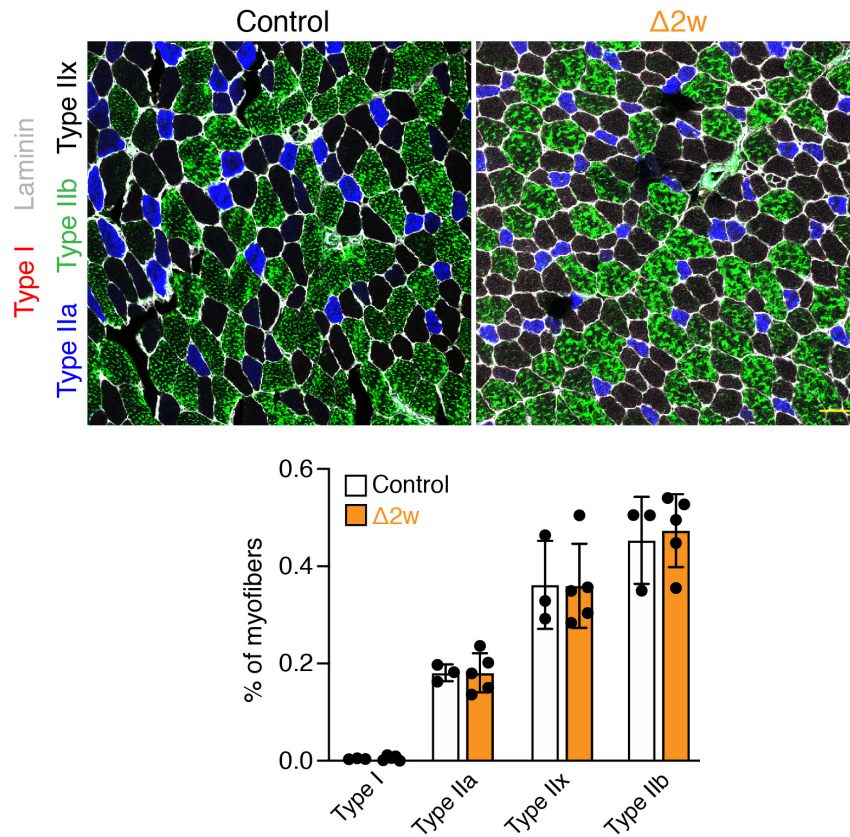

**Supplementary Fig. 4** Tibialis anterior fiber type distribution in  $\Delta 2w$  muscle. Sections of tibialis anterior (TA) muscle in control and  $\Delta 2w$  mice at 5-7 months of age immunostained with antibodies for MYH7 (Type I; red), MYH2 (Type IIa; blue), MYH4 (Type IIb; green), and laminin (white) antibodies. Unstained fibers were counted as Type IIx myofibers. 3 20x images were analyzed per mouse ( $n = 3-5$  biologically independent animals). Data presentation: Data are represented as mean  $\pm$  SD. Scale bar: 50  $\mu$ m. Source data are provided as a Source Data file.

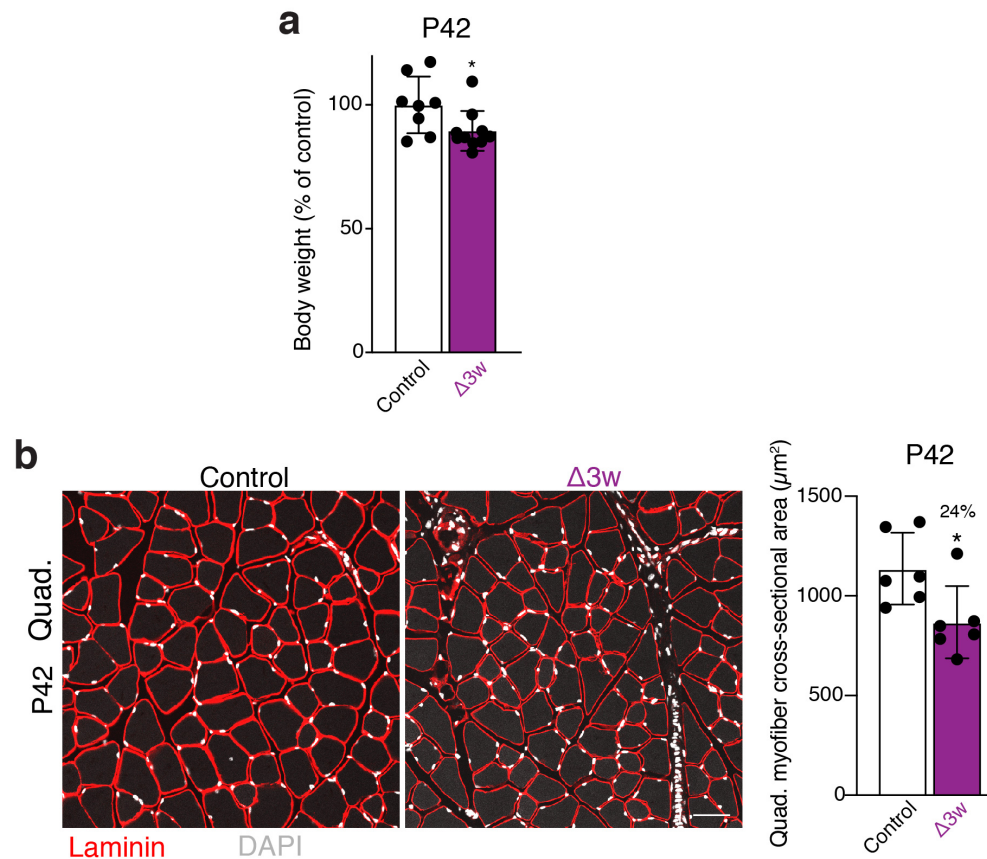

**Supplementary Fig. 5** Effects of reduced myonuclear number in  $\Delta 3w$  muscle. **a** Body weight of  $\Delta 3w$  mice expressed as a percent of control at P42 (n = 8-9 biologically independent animals). **b** Cross-sections of quadriceps (Quad.) muscle of  $\Delta 3w$  and control mice at P42 (left). Cross-sectional area analysis (right) reveals a 24% reduction in  $\Delta 3w$  quadriceps compared to controls. Sections were immunostained with laminin antibodies (red) and stained with DAPI (white). At least 3 20x images were analyzed per mouse (n = 6 biologically independent animals). Statistical analyses and data presentation: **a** and **b** two-sided unpaired *t*-test; \**p*<0.05. Data are represented as mean  $\pm$  SD. Scale bar: 50  $\mu m$ . Source data are provided as a Source Data file.

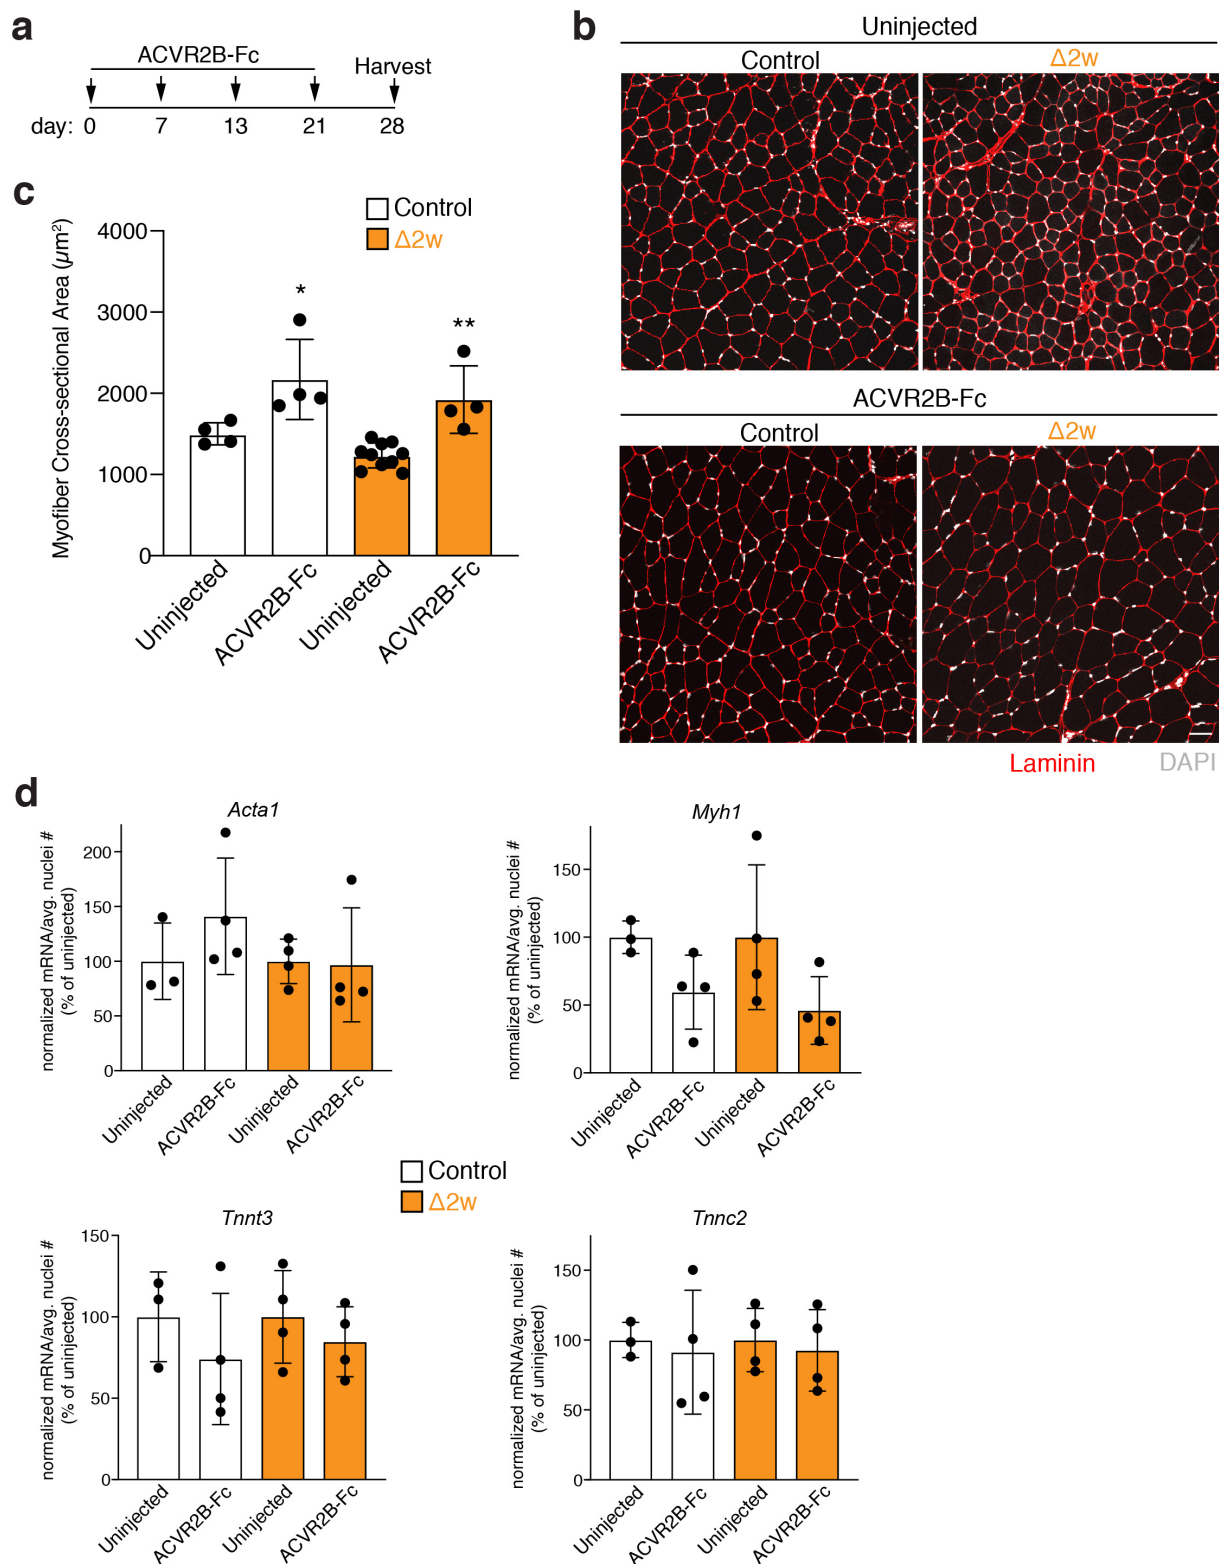

**Supplementary Fig. 6** A stimulus that increases myofiber volume does not elicit changes in mRNA concentrations. **a** Experimental design used to inhibit myostatin signaling. ACVR2B-Fc was administered to 3.5 month old control and  $\Delta 2w$  mice once a week for

four weeks. **b** Representative sections of  $\Delta 2w$  and control tibialis anterior muscle, uninjected (top) and ACVR2B-Fc-treated (bottom). Images show an increase in myofiber size in both groups following ACVR2B-Fc treatment for four weeks. Sections were immunostained with laminin antibodies (red) and stained with DAPI (white). **c** Analysis of cross-sectional area (CSA) using the images represented in (**b**) showed significant increases in the CSA of tibialis anterior muscle fibers in both control and  $\Delta 2w$  muscle injected with ACVR2B-Fc compared to their uninjected controls. At least 3 20x images were analyzed per mouse ( $n = 4-10$  biologically independent animals). **d** Concentration of transcripts coding for key skeletal muscle structural genes (*Acta1*, *Myh1*, *Tnnt3*, and *Tnnc2*) on a per nuclear basis are not significantly increased in control or  $\Delta 2w$  muscle following ACVR2B-Fc treatment. To obtain these values, relative transcript levels were determined by semi-quantitative qPCR from samples, which were then normalized to total RNA and average myonuclear numbers for each genotype ( $n = 3-4$  biologically independent animals). Statistical analyses and data presentation: **c** one-way ANOVA with a Tukey correction for multiple comparisons; \* $p < 0.05$ , \*\* $p < 0.01$ ; significance compared to uninjected groups. Data are represented as mean  $\pm$  SD. Scale bar: 50  $\mu m$ . Source data are provided as a Source Data file.

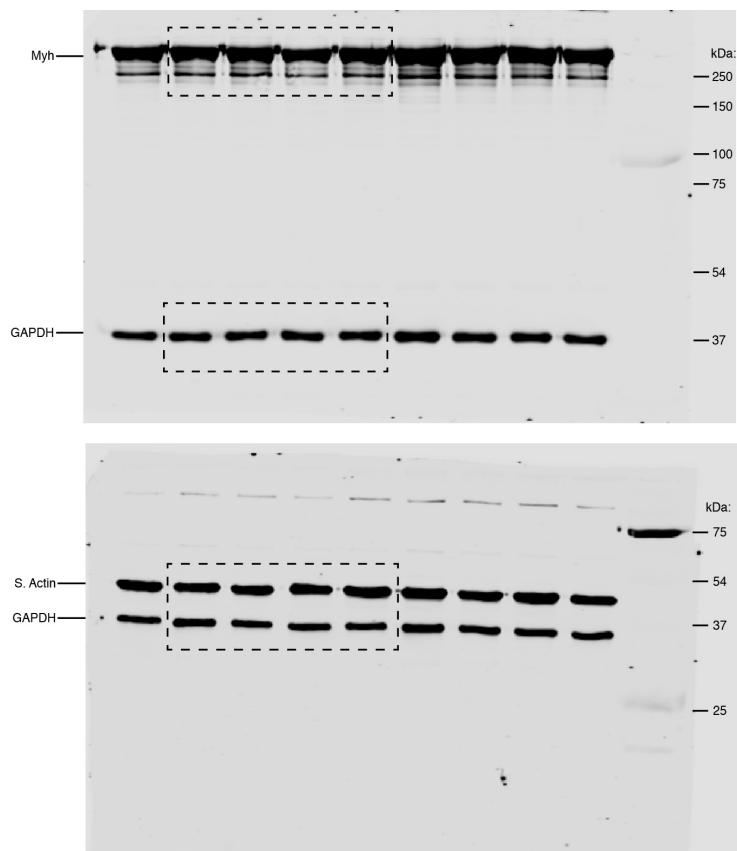

**Supplementary Fig. 7** Full western blots for cropped images shown in Fig. 5h.
